# Supplementary material for: Synthesis and structures of Co bis-trifluoromethylpyrazolate complexes
Source: Royal Society of Chemistry journal article supplement (doi:10.1039/c3dt50758k), 2013-01-01

# Synthesis and structures of Co bis-trifluoromethylpyrazolate complexes

Joseph H. Rivers and Richard A. Jones

## SUPPLEMENTARY MATERIAL

EPR data were collected on a Bruker EMX Plus X-band spectrometer with 4 mW microwave power and 0.1 G modulation amplitude with a liquid nitrogen cooled cryostat.

EPR Spectra for compounds 4 and 6 (2 pages) (frozen toluene at 100 K)

EPR for Compound 4

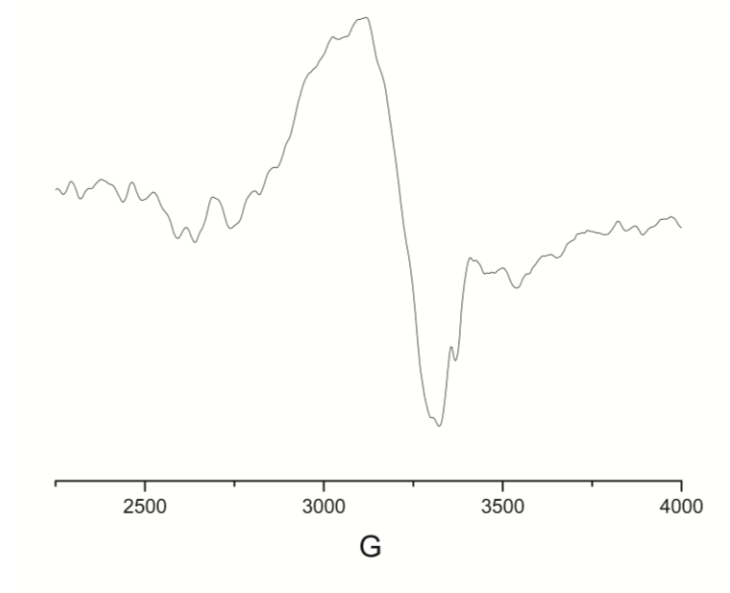

EPR for Compound 6

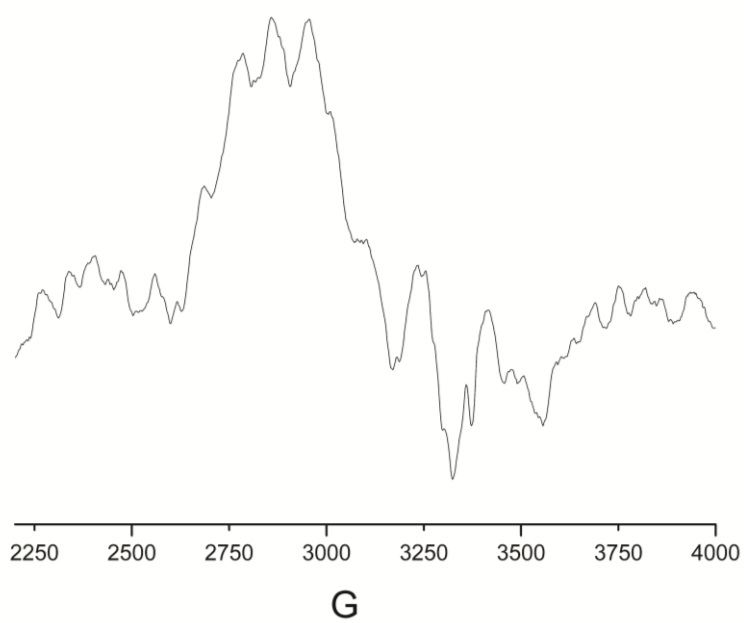

Supplement: c3dt50758k.pdf [file c3dt50758k.pdf]
